# Supplementary material
Source: publisher site journal article supplement (https://www.dovepress.com/get_supplementary_file.php?f=370441.docx)
Supplement: Supplementary file 1 [file get_supplementary_file.php]

**Appendix 1**

This questionnaire is designed to assess the attitude acceptability and willing to use OTC vending machine to deliver self-testing kits for Covid-19.

[How frequently you do agree or disagree with the following information ?].

|  | Agree | Disagree |
| --- | --- | --- |
| How frequently you do agree or disagree with the following information? |  |  |
| Using OTC vending machine to deliver Covid-19 self-testing kits is accessible 24/7 |  |  |
| Using OTC vending machine to deliver Covid-19 self-testing kits help promote precautionary and preventive measures for Covid-19 |  |  |
| OTC vending machine can provide other medicines needed to treat the symptoms of COVID-19 |  |  |
| OTC vending machines will be conveniently located (in close proximity to me) |  |  |
| Using OTC vending machine to deliver Covid-19 self-testing kits provides a guaranteed confidentiality |  |  |
| Using OTC vending machine to deliver Covid-19 self-testing kits provide a quick service, no need to wait in line (Accessibility and Convenience) |  |  |
| Compared to PCRs test, using OTC vending machines to deliver Covid-19 self-testing provides low costs |  |  |
| Do you believe OTC vending machine to deliver Covid-19 self-testing kits will be beneficial for patients with suspected or confirmed COVID-19? |  |  |
| Will you personally use OTC vending machine to deliver Covid-19 self-testing kits |  |  |
